# Supplementary material for: Stakeholder Centric Governance for Green University Transformation using a Mixed Methods Framework with Empirical Validation
Source: Research Square preprint supplement (doi:10.21203/rs.3.rs-8389103/v1), 2026-01-12
Supplement: Supplementary file 1 [file 7e04c8b4c681055fb615cc2b.docx]

**Supplementary Materials Available Online:**

- Supplementary Table S1: Complete list of 187 reviewed publications with metadata
- Supplementary Table S2: Detailed case study data extraction matrix
- Supplementary Figure S1: PRISMA flow diagram for systematic review
- Supplementary Appendix A: Search strategies for each database
- Supplementary Appendix B: Data extraction protocol and coding framework
- Supplementary Appendix C: Quality assessment criteria and scores
